# Supplementary material
Source: PubMed Central journal article supplement (PMC1796764)
Supplement: 7400882-s1.pdf [file 7400882-s1.pdf]

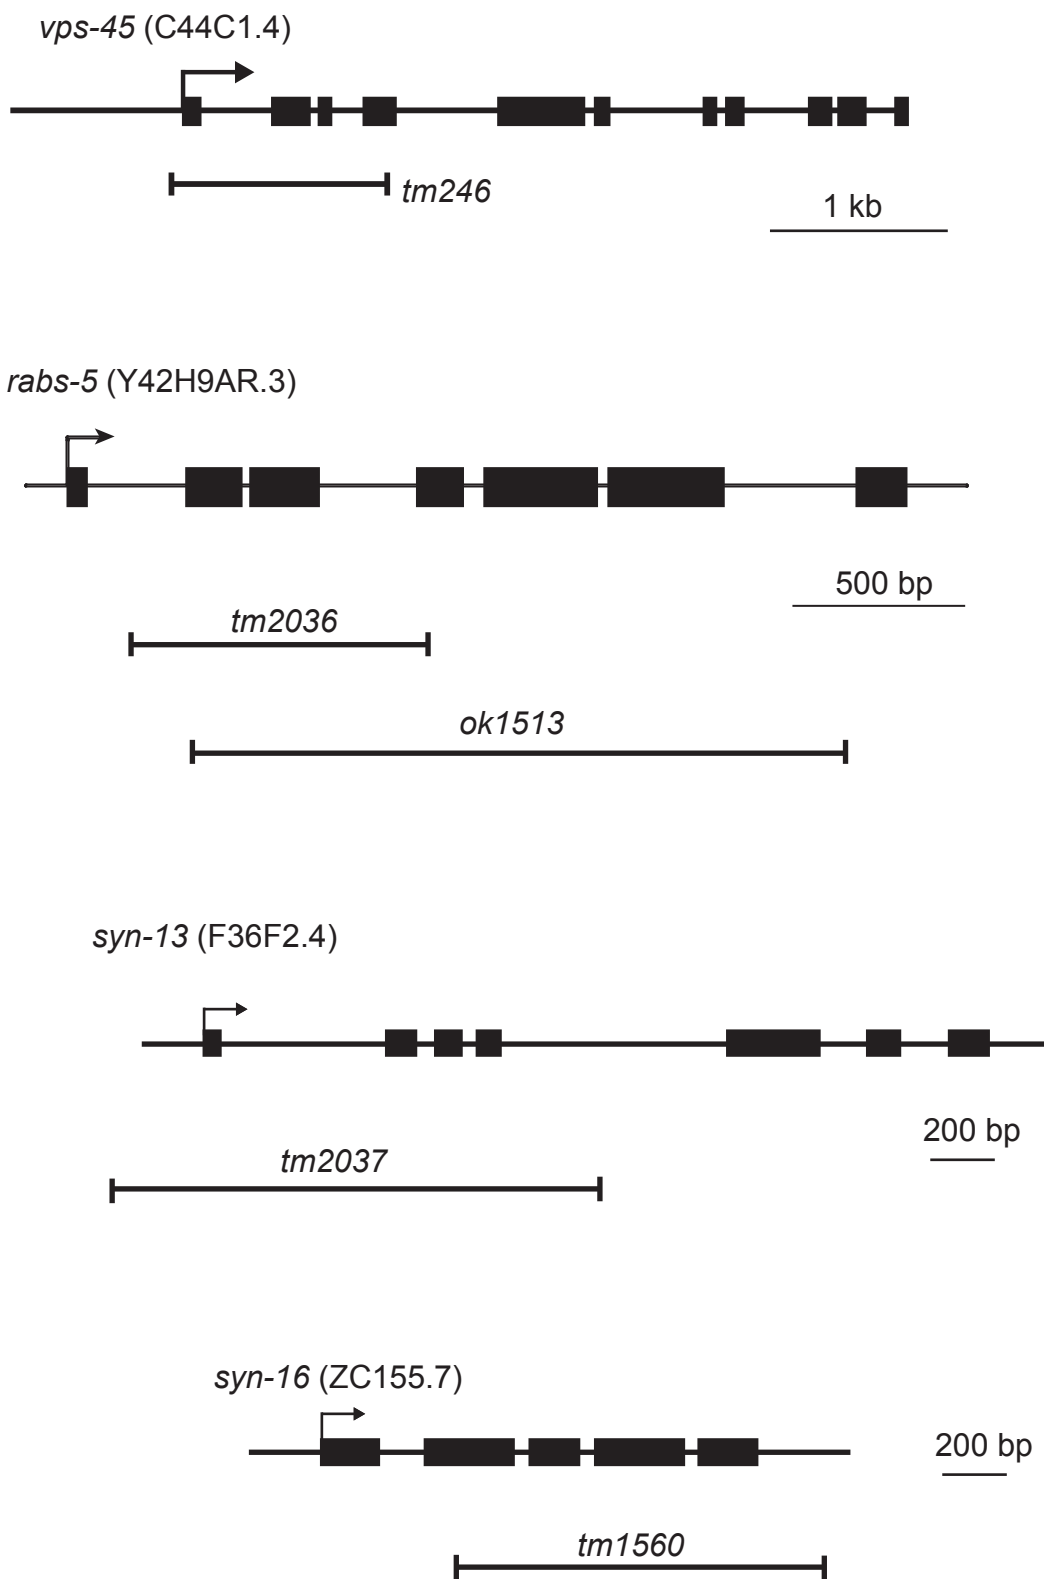

Supplementary Figure 1

**Supplementary Figure 1.** List of deletion mutations in the *vps-45*, *rabs-5*, *syn-13* and *syn-16* genes. *rabs-5* (*ok1513*) was isolated by knockout consortium. Schematic gene organizations are shown. Exons are highlighted by black boxes. Deletions at each gene are shown below. Deletion size of these mutations are as follows; *tm246* (1178 bp deletion), *tm2036* (1084 bp deletion + 1 bp insertion), *ok1513* (2384 bp deletion), *tm2037* (1514 bp deletion + 139 bp insertion) and *tm1560* (1027 bp deletion, 4 bp insertion).
