# Supplementary material
Source: PubMed Central journal article supplement (PMC1796764)
Supplement: 7400882-s3.pdf [file 7400882-s3.pdf]

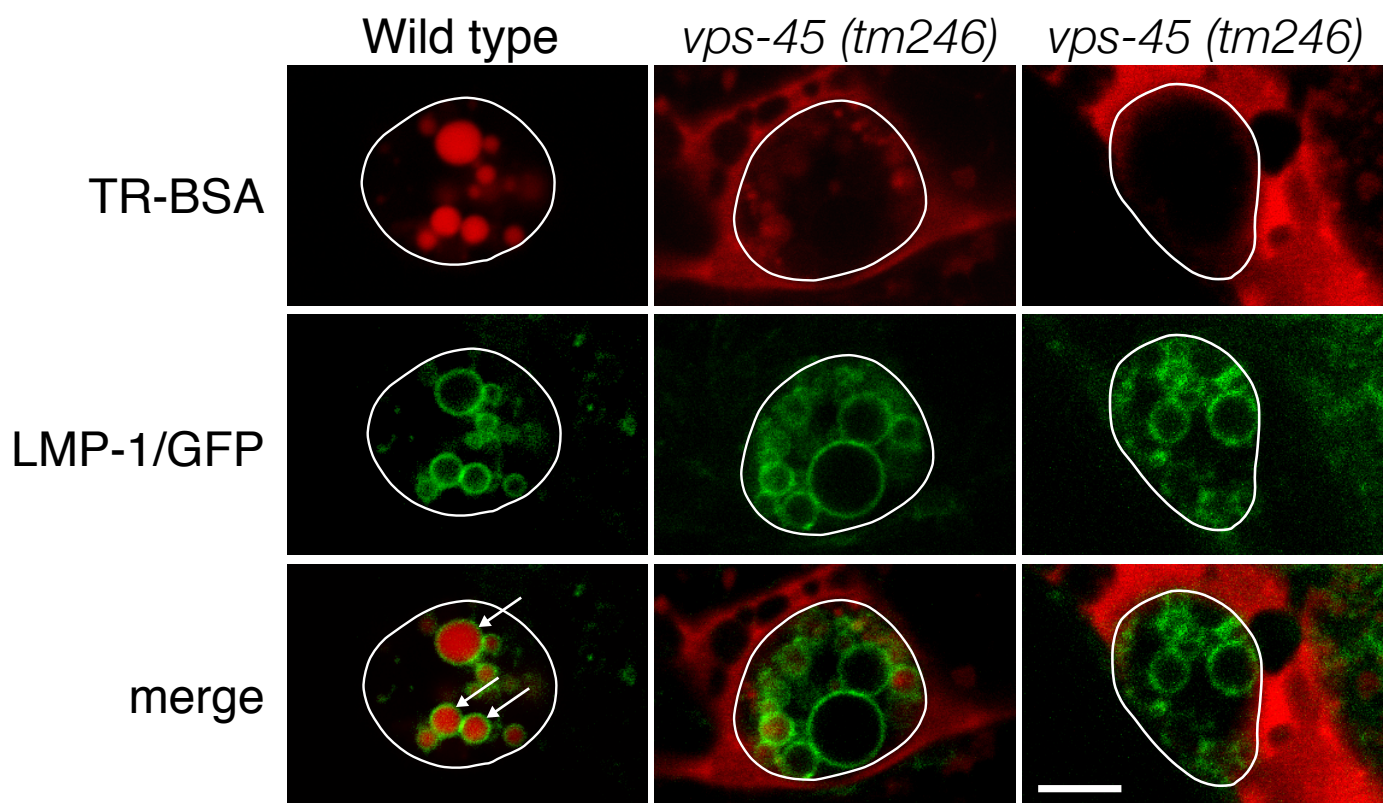

**Supplementary Figure 3**

**Supplementary Figure 3.** Confocal micrographs of the endocytosed TR-BSA by the coelomocytes expressing a lysosomal marker. After microinjection of TR-BSA into pseudocoelom, wild-type or *vps-45 (tm246)* worms carrying a *lmp-1::GFP* array were incubated for 45 min. In the wild-type (left panels), TR-BSA reached the LMP-1/GFP positive compartments (arrows). The fluorescence of TR-BSA was not seen in these organelles of the mutant coelomocytes, and the TR-BSA uptake was retarded (middle panels) or mostly blocked (right panels). Scale bar indicates 5  $\mu\text{m}$  in all images.
