# Supplementary material
Source: PubMed Central journal article supplement (PMC1796764)
Supplement: 7400882-s5.pdf [file 7400882-s5.pdf]

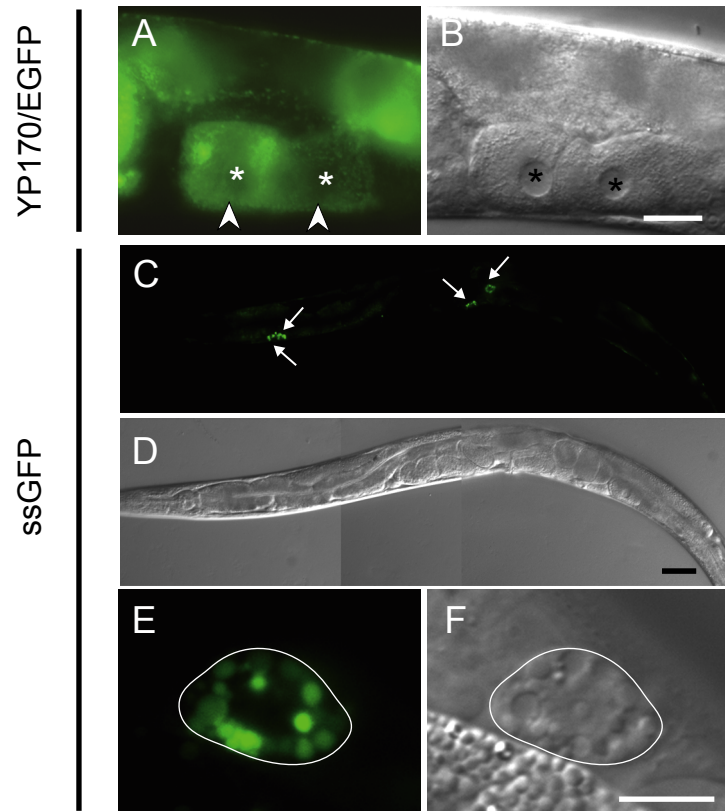

**Supplementary Figure 5**

**Supplementary Figure 5.** Endocytosis defects are not observed in *syn-13;syn-16*

double mutant. Rme (A, B) and Cup (C-F) phenotypes of *syn-13 (tm2037); syn-16*

(*tm1560*) were examined. (A) YP170/EGFP was efficiently endocytosed in the oocytes

of *syn-13;syn-16* background (arrowheads). Asterisks indicate the nucleus of oocytes.

(B) DIC image of the same field in (A). Scale bar indicates 20  $\mu\text{m}$ . (C)

Low-magnification image. GFP uptake in the mutant coelomocytes of

*syn-13;syn-16* were not blocked (arrows). (D) DIC image of the same field in (C). Scale

bar indicates 50  $\mu\text{m}$ . (E) High-magnification image. Coelomocytes are outlined. GFP

vesicles are observed in the mutant coelomocytes. Scale bar indicates 10  $\mu\text{m}$ .
