# Supplementary material
Source: PubMed Central journal article supplement (PMC1796764)
Supplement: 7400882-s6.pdf [file 7400882-s6.pdf]

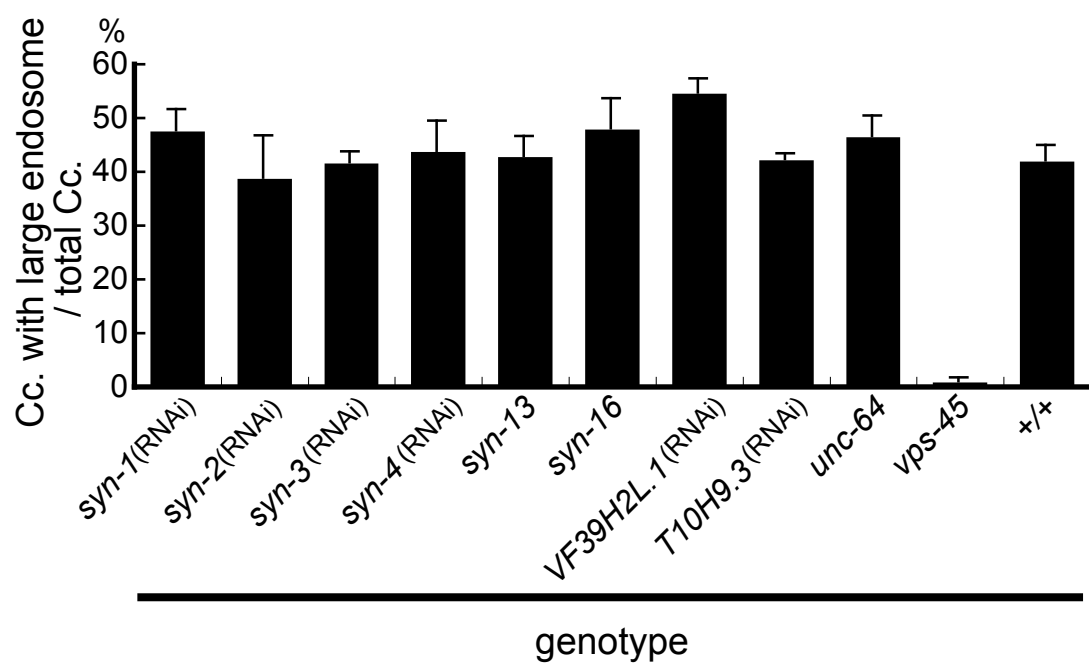

**Supplementary Figure 6**

**Supplementary Figure 6.** Large endosome assays of all syntaxin-like SNAREs in *C. elegans*. Bars indicate the percentage of coelomocytes that contain large endosomes that accumulate GFP. The mutant animals or RNAi-treated animals were assayed in the same manner as Figure 4B. Error bars indicate SEM.
