# Supplementary material
Source: PubMed Central journal article supplement (PMC1796764)
Supplement: 7400882-s7.pdf [file 7400882-s7.pdf]

A

| genetic background    | transgene (species)           | viability | endocytosis<br>in coelomocytes |
|-----------------------|-------------------------------|-----------|--------------------------------|
| +/+                   | -                             | +         | +                              |
| <i>vps-45 (tm246)</i> | -                             | -         | -                              |
| <i>vps-45 (tm246)</i> | <i>vps-45 (C. elegans)</i>    | + (3/3)   | + (2/2)                        |
| <i>vps-45 (tm246)</i> | mVps45 ( <i>M. musculus</i> ) | + (4/4)   | + (2/2)                        |
| <i>vps-45 (tm246)</i> | <i>vps45 (S. cerevisiae)</i>  | - (0/3)   | - (0/3)                        |

B

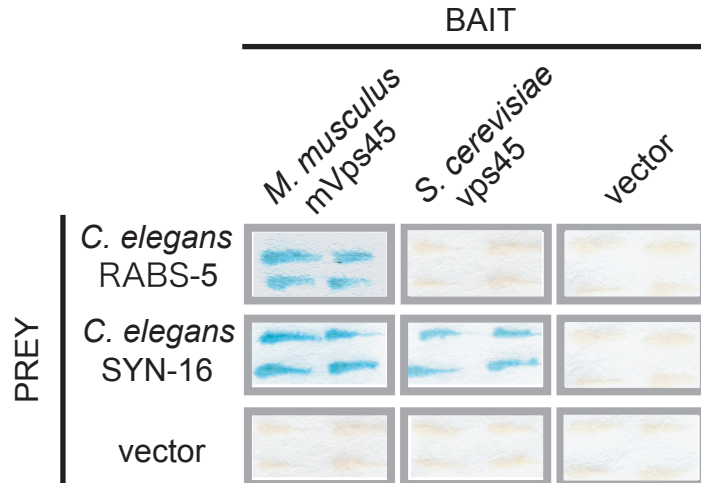

Supplementary Figure 7

**Supplementary Figure 7.** The mammalian ortholog is functionally interchangeable

with *C. elegans vps-45*. (A) Rescue experiments using transgenic worms expressing

Vps45 from *C. elegans*, mouse and yeast in the *vps-45* mutant background. The lethal

and endocytosis phenotypes (Cup) were rescued by mammalian ortholog, but were not

rescued by yeast ortholog. + means "rescued", - means "not rescued". Numbers of

rescued lines/total lines are indicated in parenthesis. (B) Yeast two hybrid assay.

Yeast strains carrying pGADT7-*rabs-5* (*C. elegans*) or pGADT7-*syn-16* (*C. elegans*)

and pGBKT7 containing *vps-45* orthologs from indicated species, were streaked on a

filter paper and subjected to the  $\beta$ -galactosidase assay. SYN-16 interacted with all

Vps45 ortholog, however, RABS-5 interacted with only *C. elegans* and mouse mVps45.

The results that the rescue activities for *vps-45* mutation were correlated with the

binding activities to RABS-5 might suggest the importance of interaction between these

proteins.
